# Supplementary material
Source: PubMed Central journal article supplement (PMC6357793)
Supplement: kwy249_arthur_web_material_final.pdf [file kwy249_arthur_web_material_final.pdf]

**Web Material**

**A Healthy Lifestyle Index in Relation to Risk of Endometrial and Ovarian Cancer Among Women in the Women’s Health Initiative Study**

Rhonda Arthur, Theodore M. Brasky, Tracy E. Crane, Ashley S. Felix, Andrew Kaunitz, Aladdin H. Shadyab, Lihong Qi, Sylvia Wassertheil-Smoller, and Thomas E. Rohan

Table of Contents

Web Table 1 ..... 2

Web Table 2 ..... 4

Web Table 3 ..... 5

**Web Table 1: Associations between Healthy Lifestyle Score (excluding BMI) and risk of endometrial cancer among women from the Women’s Health Initiative Study (1993 to 2016)**

|                     | <b>HR</b> | <b>95% CI</b> |
|---------------------|-----------|---------------|
| <b>Overall</b>      |           |               |
| Per unit increase   | 0.98      | 0.96-1.00     |
| ≤7                  | 1.00      |               |
| 8-9                 | 0.97      | 0.83-1.13     |
| 10                  | 0.87      | 0.73-1.05     |
| 11-12               | 0.88      | 0.75-1.03     |
| >12                 | 0.84      | 0.70-1.01     |
| <b>P trend</b>      |           | 0.03          |
| <b>Type 1</b>       |           |               |
| Per unit increase   | 0.98      | 0.96-1.01     |
| ≤7                  | 1.00      |               |
| 8-9                 | 0.90      | 0.75-1.06     |
| 10                  | 0.87      | 0.70-1.07     |
| 11-12               | 0.90      | 0.75-1.07     |
| >12                 | 0.81      | 0.66-0.99     |
| <b>P trend</b>      |           | 0.08          |
| <b>Type 2</b>       |           |               |
| Per unit increase   | 0.99      | 0.95-1.05     |
| ≤7                  | 1.00      |               |
| 8-9                 | 1.44      | 0.98-2.11     |
| 10                  | 1.05      | 0.65-1.70     |
| 11-12               | 0.84      | 0.54-1.30     |
| >12                 | 1.21      | 0.77-1.91     |
| <b>P trend</b>      |           | 0.52          |
| <b>Grade</b>        |           |               |
| <b>Low</b>          |           |               |
| Per unit increase   | 0.97      | 0.93-1.02     |
| ≤7                  | 1.00      |               |
| 8-9                 | 0.89      | 0.63-1.25     |
| 10                  | 0.84      | 0.55-1.28     |
| 11-12               | 0.86      | 0.60-1.24     |
| >12                 | 0.76      | 0.51-1.17     |
| <b>P trend</b>      |           | 0.25          |
| <b>Intermediate</b> |           |               |
| Per unit increase   | 1.01      | 0.98-1.05     |
| ≤7                  | 1.00      |               |
| 8-9                 | 0.91      | 0.71-1.17     |
| 10                  | 0.97      | 0.73-1.31     |
| 11-12               | 1.05      | 0.82-1.36     |
| >12                 | 0.96      | 0.72-1.29     |
| <b>P trend</b>      |           | 0.75          |
| <b>High</b>         |           |               |
| Per unit increase   | 0.95      | 0.91-0.99     |
| ≤7                  | 1.00      |               |
| 8-9                 | 0.80      | 0.58-1.11     |
| 10                  | 0.66      | 0.44-1.00     |
| 11-12               | 0.64      | 0.44-0.91     |

|                                    | <b>HR</b> | <b>95% CI</b> |
|------------------------------------|-----------|---------------|
| >12                                | 0.71      | 0.48-1.05     |
| <b>P trend</b>                     |           | 0.02          |
| <b>Stage</b>                       |           |               |
| <b>Localised</b>                   |           |               |
| Per unit increase                  | 0.98      | 0.96-1.00     |
| ≤7                                 | 1.00      |               |
| 8-9                                | 0.94      | 0.79-1.12     |
| 10                                 | 0.87      | 0.71-1.07     |
| 11-12                              | 0.87      | 0.72-1.04     |
| >12                                | 0.85      | 0.69-1.04     |
| <b>P trend</b>                     |           | 0.06          |
| <b>Regional/distant metastatic</b> |           |               |
| Per unit increase                  | 1.01      | 0.97-1.06     |
| ≤7                                 | 1.00      |               |
| 8-9                                | 1.20      | 0.84-1.72     |
| 10                                 | 1.10      | 0.71-1.69     |
| 11-12                              | 1.04      | 0.70-1.52     |
| >12                                | 1.04      | 0.67-1.61     |
| <b>P trend</b>                     |           | 0.85          |

Adjusted for age at entry, education, non-alcohol energy intake, ethnicity, age at menarche, parity, combined estrogen and progesterone therapy, unopposed estrogen therapy, oral contraceptive use, family history of endometrial cancer, age at menopause, body mass index

**Web Table 2: Associations between Healthy Lifestyle Score and risk of endometrial cancer among women from the Women’s Health Initiative Study (1995 to 2016) who had a diagnosis of endometrial cancer within two years of enrollment**

|                             | HLI scores (quintiles) |       |           |      |           |        |           |        |           |                     | Continuous<br>(per unit increase<br>in score) |        |           |
|-----------------------------|------------------------|-------|-----------|------|-----------|--------|-----------|--------|-----------|---------------------|-----------------------------------------------|--------|-----------|
|                             | ≤10                    | 11-12 |           | 13   | 14-15     |        | ≥16       |        | P-trend   | P for heterogeneity | HR                                            | 95% CI |           |
|                             | HR                     | HR    | 95% CI    |      | HR        | 95% CI | HR        | 95% CI |           |                     |                                               |        |           |
| <b>Overall</b>              | 1.00                   | 0.75  | 0.63-0.88 | 0.90 | 0.74-1.09 | 0.74   | 0.63-0.88 | 0.72   | 0.60-0.87 | <0.01               |                                               | 0.94   | 0.92-0.96 |
| Type 1                      | 1.00                   | 0.72  | 0.60-0.87 | 0.81 | 0.64-1.01 | 0.75   | 0.62-0.91 | 0.73   | 0.59-0.91 | 0.01                |                                               | 0.94   | 0.92-0.96 |
| Type 2                      | 1.00                   | 0.90  | 0.61-1.35 | 1.18 | 0.75-1.87 | 0.82   | 0.53-1.27 | 0.80   | 0.50-1.28 | 0.33                | 0.92                                          | 0.96   | 0.92-1.01 |
| <b>Grade</b>                |                        |       |           |      |           |        |           |        |           |                     |                                               |        |           |
| Well-differentiated         | 1.00                   | 0.63  | 0.42-0.95 | 0.74 | 0.46-1.21 | 0.73   | 0.49-1.10 | 0.83   | 0.54-1.26 | 0.49                |                                               | 0.94   | 0.90-0.99 |
| Moderately-differentiated   | 1.00                   | 0.72  | 0.55-0.94 | 1.01 | 0.74-1.37 | 0.84   | 0.64-1.10 | 0.84   | 0.63-1.14 | 0.46                |                                               | 0.97   | 0.94-0.99 |
| Poorly-differentiated       | 1.00                   | 0.61  | 0.42-0.88 | 0.75 | 0.49-1.15 | 0.64   | 0.44-0.93 | 0.58   | 0.38-0.88 | 0.01                | 0.64                                          | 0.92   | 0.88-0.96 |
| <b>Stage</b>                |                        |       |           |      |           |        |           |        |           |                     |                                               |        |           |
| Localized                   | 1.00                   | 0.74  | 0.61-0.89 | 0.90 | 0.73-1.12 | 0.76   | 0.62-0.92 | 0.74   | 0.60-0.92 | 0.01                |                                               | 0.95   | 0.93-0.97 |
| Regional/distant metastatic | 1.00                   | 0.78  | 0.53-1.15 | 1.04 | 0.67-1.61 | 0.82   | 0.55-1.23 | 0.78   | 0.50-1.21 | 0.35                | 0.48                                          | 0.96   | 0.92-1.00 |

Adjusted for age at entry, education, non-alcohol energy intake, ethnicity, age at menarche, parity, combined estrogen and progesterone therapy, unopposed estrogen therapy, oral contraceptive use, family history of endometrial cancer, age at menopause

**Web Table 3: Associations between Healthy Lifestyle Score and risk of ovarian cancer among women from the Women’s Health Initiative Study (1995 to 2016) who had a diagnosis of ovarian cancer within two years of enrollment**

|                             | HLI score (quintiles) |       |           |      |           |       |           |      |           |         | Continuous (per unit score) |      |           |
|-----------------------------|-----------------------|-------|-----------|------|-----------|-------|-----------|------|-----------|---------|-----------------------------|------|-----------|
|                             | ≤10                   | 11-12 |           | 13   |           | 14-15 |           | ≥16  |           | P-trend | P for heterogeneity         | HR   | 95% CI    |
|                             | HR                    | HR    | (95% CI)  | HR   | (95% CI)  | HR    | (95% CI)  | HR   | (95% CI)  |         |                             | HR   | 95% CI    |
| <b>Overall</b>              | 1.00                  | 0.86  | 0.70-1.06 | 0.91 | 0.71-1.16 | 0.95  | 0.78-1.17 | 0.92 | 0.74-1.14 | 0.73    |                             | 0.99 | 0.97-1.02 |
| Serous                      | 1.00                  | 0.98  | 0.72-1.34 | 0.98 | 0.67-1.42 | 1.21  | 0.89-1.63 | 1.21 | 0.86-1.66 | 0.11    |                             | 1.03 | 0.99-1.06 |
| High grade serous           | 1.00                  | 0.94  | 0.58-1.51 | 0.88 | 0.49-1.57 | 1.04  | 0.65-1.66 | 0.96 | 0.58-1.59 | 0.95    |                             | 0.99 | 0.95-1.06 |
| Non-serous                  | 1.00                  | 0.75  | 0.53-1.06 | 0.98 | 0.67-1.44 | 0.92  | 0.66-1.28 | 0.85 | 0.59-1.21 | 0.72    | 0.48                        | 0.99 | 0.95-1.03 |
| <b>Grade</b>                |                       |       |           |      |           |       |           |      |           |         |                             |      |           |
| Intermediate                | 1.00                  | 1.41  | 0.73-2.74 | 1.74 | 0.83-3.67 | 1.82  | 0.95-3.48 | 0.95 | 0.43-2.11 | 0.61    |                             | 1.04 | 0.97-1.12 |
| High                        | 1.00                  | 1.02  | 0.69-1.50 | 1.19 | 0.76-1.84 | 1.15  | 0.79-1.69 | 1.12 | 0.75-1.67 | 0.42    | 0.19                        | 1.04 | 0.95-1.13 |
| <b>Stage</b>                |                       |       |           |      |           |       |           |      |           |         |                             |      |           |
| Localised                   | 1.00                  | 1.42  | 0.88-2.30 | 0.76 | 0.38-1.53 | 1.08  | 0.64-1.83 | 0.88 | 0.49-1.59 | 0.81    |                             | 0.98 | 0.92-1.04 |
| Regional/distant metastatic | 1.00                  | 0.86  | 0.67-1.10 | 1.04 | 0.79-1.38 | 1.08  | 0.85-1.37 | 1.12 | 0.87-1.43 | 0.13    | 0.94                        | 1.02 | 0.99-1.05 |

Adjusted for age at entry, education, non-alcohol energy intake, ethnicity, age at menarche, parity, combined estrogen and progesterone therapy, unopposed estrogen therapy, oral contraceptive use, family history of endometrial cancer, age at menopause
